# Supplementary material for: Salicylic acid antagonizes abscisic acid inhibition of shoot growth and cell cycle progression in rice
Source: PubMed Central journal article supplement — Sci Rep. 2014 Apr 1;4:4555. doi: 10.1038/srep04555 (PMC3971400; doi:10.1038/srep04555), 2014-04-01
Supplement: srep04555-s1.pdf [file srep04555-s1.pdf]

## SUPPLEMENTARY INFORMATION

### Salicylic acid antagonizes abscisic acid inhibition of shoot growth and cell cycle progression in rice

Ayano Meguro and Yutaka Sato\*

Crop Breeding Research Division, NARO Hokkaido Agricultural Research Center

Hitsujigaoka 1, Toyohira-ku, Sapporo 062-8555, Japan

\*Corresponding author. E-mail: yutaka@affrc.go.jp

## CONTENTS

| <u>Supplementary Tables</u>                                                                                                                 | page   |
|---------------------------------------------------------------------------------------------------------------------------------------------|--------|
| Table S1 Gene expression ratios of <i>OsCDKBs</i> , <i>OsKRPs</i> , and <i>Orysa:CycDs</i> after 5-d treatment with various plant hormones. | .....2 |
| Table S2 The ratios of the 2C and 4C cells in controls and hormone-treated tissues.                                                         | .....3 |
| Table S3 Sequences of the primers and universal probes.                                                                                     | .....4 |
| Table S4 Probes used for microarray analysis.                                                                                               | .....5 |
| <br>                                                                                                                                        |        |
| <u>Supplementary Figures</u>                                                                                                                | page   |
| Fig. S1 Normalized microarray expression values of <i>OsKRPs</i> after ABA treatment for 6 h.                                               | .....6 |
| Fig. S2 Changes in expression of <i>Orysa:CycDs</i> in shoots of young rice seedlings during ABA and SA treatment.                          | .....6 |

Supplementary Table S1 Gene expression ratios of *OsCDKBs*, *OsKRPs*, and *Orysa:CycDs* after 5-d treatment with various plant hormones.

| Gene name            | ABA <sup>a</sup> | ABA-SA <sup>b</sup> | SA <sup>a</sup> | ABA-IAA <sup>b</sup> | IAA <sup>a</sup> | ABA-BAP <sup>b</sup> | BAP <sup>a</sup> | ABA-GA <sup>b</sup> | GA <sup>a</sup> |
|----------------------|------------------|---------------------|-----------------|----------------------|------------------|----------------------|------------------|---------------------|-----------------|
| <i>OsCDKA:1</i>      | 1.26 ± 0.12*     | 0.96 ± 0.11         | 1.19 ± 0.18     | 0.98 ± 0.11          | 0.8 ± 0.08*      | 0.85 ± 0.34          | 1.55 ± 0.21*     | 1.61 ± 0.14*        | 0.99 ± 0.18     |
| <i>OsCDKA:2</i>      | 0.86 ± 0.10      | 0.80 ± 0.13         | 1.00 ± 0.05     | 0.62 ± 0.08          | 0.51 ± 0.11**    | 0.61 ± 0.11          | 0.77 ± 0.12      | 0.41 ± 0.34         | 0.78 ± 0.13     |
| <i>OsCDKB:1</i>      | 0.43 ± 0.03***   | 0.64 ± 0.06*        | 0.80 ± 0.07**   | 0.53 ± 0.07          | 0.61 ± 0.02***   | 0.71 ± 0.15          | 0.86 ± 0.04**    | 0.32 ± 0.12         | 0.68 ± 0.11*    |
| <i>OsCDKB:2</i>      | 0.39 ± 0.05***   | 0.73 ± 0.12*        | 1.00 ± 0.09     | 0.66 ± 0.05**        | 0.77 ± 0.06**    | 0.62 ± 0.08*         | 0.76 ± 0.05**    | 0.16 ± 0.06*        | 0.61 ± 0.07**   |
| <i>OsCDKC:1</i>      | 1.11 ± 0.10      | 0.82 ± 0.13         | 1.09 ± 0.14     | 0.47 ± 0.01**        | 0.42 ± 0.03***   | 0.50 ± 0.05**        | 0.55 ± 0.03***   | 0.84 ± 0.17         | 0.42 ± 0.04***  |
| <i>OsCDKC:2</i>      | 1.15 ± 0.16      | 0.88 ± 0.17         | 1.14 ± 0.16     | 0.47 ± 0.03**        | 0.39 ± 0.03***   | 0.76 ± 0.04*         | 0.84 ± 0.09      | 0.800.17            | 0.34 ± 0.03***  |
| <i>OsCDKD:1</i>      | 1.07 ± 0.12      | 0.82 ± 0.16         | 1.06 ± 0.13     | 0.50 ± 0.03**        | 0.48 ± 0.09**    | 0.72 ± 0.05*         | 0.71 ± 0.06**    | 0.58 ± 0.14*        | 0.36 ± 0.05***  |
| <i>OsCDKE:1</i>      | 1.33 ± 0.13*     | 0.90 ± 0.10*        | 1.09 ± 0.15     | 0.51 ± 0.05**        | 0.44 ± 0.05***   | 0.65 ± 0.08**        | 0.73 ± 0.09*     | 1.05 ± 0.28         | 0.40 ± 0.08***  |
| <i>OsCDKF:1</i>      | 1.47 ± 0.17*     | 0.81 ± 0.08**       | 1.06 ± 0.13     | 0.74 ± 0.15**        | 0.64 ± 0.09**    | 0.33 ± 0.03***       | 0.36 ± 0.03***   | 1.63 ± 0.20         | 0.60 ± 0.26     |
| <i>OsCDKF:3</i>      | 0.74 ± 0.13      | 1.04 ± 0.18         | 1.24 ± 0.03***  | 0.49 ± 0.08          | 0.30 ± 0.02***   | 0.27 ± 0.06*         | 0.32 ± 0.03***   | 0.61 ± 0.10         | 0.29 ± 0.09***  |
| <i>OsCDKF:4</i>      | 0.77 ± 0.13      | 0.76 ± 0.16         | 1.07 ± 0.13     | 0.42 ± 0.04*         | 0.35 ± 0.07***   | 0.59 ± 0.08          | 0.64 ± 0.01***   | 0.41 ± 0.08*        | 0.27 ± 0.06***  |
| <i>OsCDKG:1</i>      | 1.32 ± 0.07**    | 0.95 ± 0.13*        | 1.21 ± 0.07**   | 0.48 ± 0.07***       | 0.39 ± 0.07***   | 0.53 ± 0.02***       | 0.63 ± 0.03***   | 0.85 ± 0.13         | 0.26 ± 0.07***  |
| <i>OsCDKG:2</i>      | 1.19 ± 0.17      | 0.73 ± 0.11*        | 0.99 ± 0.07     | 0.41 ± 0.07**        | 0.28 ± 0.03***   | 0.38 ± 0.05**        | 0.42 ± 0.09***   | 1.59 ± 0.22         | 0.42 ± 0.10***  |
| <i>OsKRP1</i>        | 0.52 ± 0.10**    | 0.50 ± 0.15         | 0.94 ± 0.11     | 0.69 ± 0.16          | 0.52 ± 0.10**    | 0.19 ± 0.04*         | 0.23 ± 0.01***   | 0.29 ± 0.1          | 0.15 ± 0.05***  |
| <i>OsKRP3</i>        | 0.32 ± 0.05***   | 0.45 ± 0.05         | 0.73 ± 0.02***  | 0.87 ± 0.06**        | 0.82 ± 0.12*     | 0.12 ± 0.04**        | 0.25 ± 0.03***   | 0.16 ± 0.07         | 0.19 ± 0.07***  |
| <i>OsKRP4</i>        | 1.70 ± 0.14**    | 0.94 ± 0.12**       | 1.07 ± 0.01***  | 0.71 ± 0.08**        | 0.64 ± 0.04***   | 0.97 ± 0.19*         | 1.14 ± 0.06*     | 1.03 ± 0.08*        | 0.36 ± 0.02***  |
| <i>OsKRP5</i>        | 1.31 ± 0.03***   | 0.66 ± 0.05***      | 0.84 ± 0.05**   | 1.34 ± 0.07          | 1.08 ± 0.02**    | 0.50 ± 0.05***       | 0.59 ± 0.05***   | 0.81 ± 0.04*        | 0.58 ± 0.01***  |
| <i>OsKRP6</i>        | 0.73 ± 0.24      | 0.59 ± 0.09         | 0.69 ± 0.17     | 0.29 ± 0.11          | 0.13 ± 0.04***   | 0.29 ± 0.06          | 0.33 ± 0.07**    | 0.13 ± 0.08         | 0.03 ± 0.02***  |
| <i>Orysa:CycD2:1</i> | 0.48 ± 0.02***   | 0.43 ± 0.02         | 0.65 ± 0.17*    | 0.68 ± 0.08*         | 0.62 ± 0.06***   | 0.50 ± 0.09          | 0.46 ± 0.10*     | 0.19 ± 0.03***      | 0.42 ± 0.05***  |
| <i>Orysa:CycD2:2</i> | 0.46 ± 0.04***   | 0.65 ± 0.09         | 0.75 ± 0.12*    | 0.52 ± 0.06          | 0.56 ± 0.07**    | 0.45 ± 0.07          | 0.53 ± 0.08***   | 0.23 ± 0.03**       | 0.60 ± 0.01***  |
| <i>Orysa:CycD4:1</i> | 2.44 ± 0.26**    | 0.90 ± 0.09**       | 1.03 ± 0.14     | 1.55 ± 0.17*         | 1.25 ± 0.03***   | 1.25 ± 0.13**        | 1.06 ± 0.03*     | 1.72 ± 0.13*        | 0.87 ± 0.07     |
| <i>Orysa:CycD4:2</i> | 0.70 ± 0.06**    | 0.74 ± 0.05         | 0.83 ± 0.12     | 0.62 ± 0.06          | 0.62 ± 0.03***   | 0.56 ± 0.08          | 0.61 ± 0.09**    | 0.33 ± 0.01***      | 0.45 ± 0.07***  |
| <i>Orysa:CycD3:1</i> | 0.54 ± 0.07***   | 0.64 ± 0.07         | 0.78 ± 0.15     | 1.37 ± 0.14**        | 1.29 ± 0.14*     | 0.89 ± 0.07**        | 0.96 ± 0.09      | 0.22 ± 0.02**       | 0.61 ± 0.05***  |
| <i>Orysa:CycD5:1</i> | 0.48 ± 0.03***   | 0.63 ± 0.03**       | 0.78 ± 0.16     | 0.93 ± 0.09**        | 0.85 ± 0.07*     | 0.53 ± 0.05          | 0.49 ± 0.05***   | 0.26 ± 0.06**       | 0.51 ± 0.05***  |
| <i>Orysa:CycD5:2</i> | 0.95 ± 0.11      | 1.47 ± 0.03**       | 1.23 ± 0.16     | 1.81 ± 0.17**        | 1.27 ± 0.08**    | 0.55 ± 0.07*         | 0.62 ± 0.11**    | 0.85 ± 0.15         | 0.68 ± 0.08**   |
| <i>Orysa:CycD5:3</i> | 1.49 ± 0.15**    | 0.84 ± 0.12**       | 0.95 ± 0.12     | 0.76 ± 0.07**        | 0.62 ± 0.09**    | 0.39 ± 0.06***       | 0.61 ± 0.10**    | 1.22 ± 0.14         | 0.48 ± 0.08***  |
| <i>Orysa:CycD6:1</i> | 0.48 ± 0.04***   | 0.70 ± 0.05**       | 0.92 ± 0.26     | 0.54 ± 0.08          | 0.62 ± 0.01***   | 0.55 ± 0.10          | 0.59 ± 0.12**    | 0.26 ± 0.02**       | 0.43 ± 0.06***  |

Gene expression ratio was represented as the ratio of expression levels in hormone-treated seedlings to those in untreated seedlings. Three biological replicates were performed.

a) Asterisks indicate a significant difference from the control mean. b) Asterisks indicate a significant difference from ABA sole treatment.

\*P < 0.05, \*\* P < 0.01, \*\*\* P < 0.001; Student's t-test.

Supplementary Table S2 The ratios of the 2C and 4C cells in controls and hormone-treated tissues.

| Treatment                       | Average of the number of counted nuclei per sample | 2C % |     | 4C%  |     |
|---------------------------------|----------------------------------------------------|------|-----|------|-----|
|                                 |                                                    | Mean | SD  | Mean | SD  |
| Control (2 d)                   | 18759.8                                            | 94.1 | 0.5 | 5.9  | 0.5 |
| Control (5 d)                   | 15516.6                                            | 91.9 | 0.6 | 8.1  | 0.6 |
| 2 $\mu$ M ABA (2 d)             | 16086.4                                            | 96.1 | 0.6 | 3.9  | 0.6 |
| 2 $\mu$ M ABA (5 d)             | 14313.6                                            | 96.1 | 0.5 | 3.9  | 0.5 |
| 0.4 mM SA + 2 $\mu$ M ABA (2 d) | 19988.2                                            | 95.9 | 0.6 | 4.1  | 0.6 |
| 0.4 mM SA + 2 $\mu$ M ABA (5 d) | 17814.6                                            | 93.4 | 1.0 | 6.6  | 1.0 |
| 1 mM SA + 2 $\mu$ M ABA (2 d)   | 19548.8                                            | 94.7 | 0.8 | 5.3  | 0.8 |
| 1 mM SA + 2 $\mu$ M ABA (5 d)   | 18323.0                                            | 91.5 | 0.4 | 8.5  | 0.4 |
| 1 mM SA (2 d)                   | 19213.4                                            | 94.2 | 0.7 | 5.8  | 0.7 |
| 1 mM SA (5d)                    | 17533.0                                            | 92.3 | 0.4 | 7.7  | 0.4 |

Supplementary Table S3 Sequences of the primers and universal probes.

| Gene                 | Locus/Accession No. | Forward primer                                                                                                                     | Reverse primer                                                                                                                     | Purpose                                                                                                     | TaqMan probes |
|----------------------|---------------------|------------------------------------------------------------------------------------------------------------------------------------|------------------------------------------------------------------------------------------------------------------------------------|-------------------------------------------------------------------------------------------------------------|---------------|
| <i>OsKRP1</i>        | Os02g0762400        | cgagatcgaggcgttctt<br>gaaacggccaaagaaggcgac<br>gaggccagtgaattcatgggcaagtacatgaggaagttc                                             | caccggagtccactcgaa<br>gtcgaatcgggtggtttagg<br>gagctcgatggatcctcagcttcggctgctgaccaccgg                                              | qRT-PCR<br>cDNA cloning 1st PCR<br>cDNA cloning 2nd PCR                                                     | #30           |
| <i>OsKRP3</i>        | Os11g0614800        | gacgtcgtcagtgagaaaga                                                                                                               | cagggttgtgcttgctc                                                                                                                  | qRT-PCR                                                                                                     | #70           |
| <i>OsKRP4</i>        | Os10g0471700        | gccacaacattattccagca<br>ccttagccgetaatgetccg                                                                                       | ggcagtcattcacaggatca<br>tetgccacgetactactgtg                                                                                       | qRT-PCR<br>cDNA cloning 1st PCR                                                                             | #11           |
| <i>OsKRP5</i>        | Os03g0137800        | catggaggccgaattcatgggcaagtacatgcgcaaggcc<br>gcgacaacgttcttgacctc<br>cgcgattctctccttcc                                              | gcaggtcgacggatcctcagcttagctgaccttcaaa<br>aggcgtgtctccctggg<br>gaattgcattttgctctgcc                                                 | cDNA cloning 2nd PCR<br>qRT-PCR<br>cDNA cloning 1st PCR<br>cDNA cloning 2nd PCR                             | #55           |
| <i>OsKRP6</i>        | Os09g0459900        | ccaggaaggcgaagaagg<br>agcataaaggaggaggaggag<br>gaggccagtgaattcatggctgccgcggccaccctg                                                | ggagctgcagcggatccctagcagcttagccttgcattc<br>ggctgtgcatcctcctgac<br>gagctcgatggatcctcagggcgtaccgggacccaactc                          | qRT-PCR<br>cDNA cloning 1st PCR<br>cDNA cloning 2nd PCR                                                     | #108          |
| <i>OsCDKA:1</i>      | Os03g0118400        | cgggctactaatgcaactgaa<br>attgggaggcgaacaggagg<br>gaggccagtgaattcatgggcaagtacgagaaggaggag                                           | ctctggagctctataccacaagg<br>aagggcacagcgttcacag<br>gagctcgatggatcctcattgtaccatctcaaggtcctt                                          | qRT-PCR<br>cDNA cloning 1st PCR<br>cDNA cloning 2nd PCR pGADT7 vector                                       | #37           |
| <i>OsCDKA:2</i>      | Os02g0123100        | catggaggccgaattcatgggcaagtacgagaaggaggag<br>gatcggcgtaccaactcatt<br>tcatacccaagtccaccac<br>gaggccagtgaattcatgggcaagtacgagaaggaggag | gcaggtcgacggatcctcattgtaccatctcaaggtcctt<br>tgctctataccacaagtgcacca<br>ctcggctgagcaaaatgc<br>gagctcgatggatcctcagccactccagggtcctgaa | cDNA cloning 2nd PCR pGBKT7 vector<br>qRT-PCR<br>cDNA cloning 1st PCR<br>cDNA cloning 2nd PCR pGADT7 vector | #37           |
| <i>OsCDKB:1</i>      | Os01g0897000        | accggtgtgacatttggtt                                                                                                                | tgccagtcctcaaatcagt                                                                                                                | qRT-PCR                                                                                                     | #68           |
| <i>OsCDKB:2</i>      | Os08g0512600        | ctaagaagtacaccacgaga<br>caaaccctaaatccacgcgc<br>gaggccagtgaattcatgggcaagtacgagaaggaggag                                            | agatgtcaaccggagtgag<br>ttcagggcaggctagtcac<br>gagctcgatggatcctcagtagactccttgttcacgctc                                              | qRT-PCR<br>cDNA cloning 1st PCR<br>cDNA cloning 2nd PCR pGADT7 vector                                       | #142          |
| <i>OsCDKC:1</i>      | Os05g0389700        | catggaggccgaattcatgggcaagtacgagaaggaggag                                                                                           | gcaggtcgacggatcctcagtagactccttgttcacgctc                                                                                           | cDNA cloning 2nd PCR pGBKT7 vector                                                                          |               |
| <i>OsCDKC:2</i>      | Os01g0958000        | tttgacagacttctcaatgg                                                                                                               | catcaaatatgttctcagttgct                                                                                                            | qRT-PCR                                                                                                     | #72           |
| <i>OsCDKD:1</i>      | Os05g0392300        | ggaaagccaatattgacagga                                                                                                              | gcgtaccacaaaagctcaaaaa                                                                                                             | qRT-PCR                                                                                                     | #106          |
| <i>OsCDKE:1</i>      | Os10g0580300        | ttgctgaactgctgcttagg                                                                                                               | ttccaagtgtgataatgtcac                                                                                                              | qRT-PCR                                                                                                     | #80           |
| <i>OsCDKF:1</i>      | Os06g0334400        | aaagtataacggggtgtgtt                                                                                                               | ttcagcaaaaatgcaaccaa                                                                                                               | qRT-PCR                                                                                                     | #50           |
| <i>OsCDKF:3</i>      | Os06g0334400        | cctgctcatctccgaggac                                                                                                                | ttggtatgttctctctctga                                                                                                               | qRT-PCR                                                                                                     | #162          |
| <i>OsCDKF:4</i>      | Os03g0847600        | tgatattgtggctgttggtg                                                                                                               | tatgatccgggtgcccaag                                                                                                                | qRT-PCR                                                                                                     | #102          |
| <i>OsCDKG:1</i>      | Os02g0700600        | tgaagtttcagttccctcaggt                                                                                                             | gtccatgagcacagtgatg                                                                                                                | qRT-PCR                                                                                                     | #53           |
| <i>OsCDKG:2</i>      | Os02g0602100        | ggtttcgcgaactacactctg                                                                                                              | atgtttctgaaagcctctg                                                                                                                | qRT-PCR                                                                                                     | #15           |
| <i>Orysa:CycD2:1</i> | Os04g0488000        | caccaggaaatcaatggaca                                                                                                               | gggcatcaagcttctctatc                                                                                                               | qRT-PCR                                                                                                     | #5            |
| <i>Orysa:CycD2:2</i> | Os07g0620800        | aatctgaaatccctgtaataaggag                                                                                                          | tgtggaactgaagagcttgc                                                                                                               | qRT-PCR                                                                                                     | #150          |
| <i>Orysa:CycD3:1</i> | Os06g0217900        | tatgagagctcggcgtcaa                                                                                                                | tgaaggctcaaatgtacaacga                                                                                                             | qRT-PCR                                                                                                     | #63           |
| <i>Orysa:CycD4:1</i> | Os09g0111100        | ggctgctctggtcggtatc                                                                                                                | gaacctctctcctcaagc                                                                                                                 | qRT-PCR                                                                                                     | #7            |
| <i>Orysa:CycD4:2</i> | Os09g0466100        | caggcagccacaaaagagtag                                                                                                              | cactgtcactcgtctctgc                                                                                                                | qRT-PCR                                                                                                     | #103          |
| <i>Orysa:CycD5:1</i> | Os08g0479300        | accggcgtggtagaagaa                                                                                                                 | cttctggcattgcaaaa                                                                                                                  | qRT-PCR                                                                                                     | #110          |
| <i>Orysa:CycD5:2</i> | Os12g058800         | ggagaagagataatgaacaaaggaa                                                                                                          | ggaatttggggctcaagta                                                                                                                | qRT-PCR                                                                                                     | #55           |
| <i>Orysa:CycD5:3</i> | Os03g0617500        | tgcaactgcaactcactg                                                                                                                 | agcactgttctcagcttctctc                                                                                                             | qRT-PCR                                                                                                     | #12           |
| <i>Orysa:CycD6:1</i> | Os03g0203800        | aaggttgcaactgcctca                                                                                                                 | cagagctggactccaacca                                                                                                                | qRT-PCR                                                                                                     | #19           |
| <i>Orysa:CycD6:2</i> | Os07g0556000        | agcgagagatagggtgacga                                                                                                               | aaagaaagagcagggcaaga                                                                                                               | qRT-PCR                                                                                                     | #11           |

Supplementary Table S4 Probes used for microarray analysis.

| Gene          | Locus/Accession No. | Probe name                                     |
|---------------|---------------------|------------------------------------------------|
| <i>OsKRP1</i> | Os02g0762400        | Os02g0762400   mRNA   AK103084   CDS+3'UTR     |
| <i>OsKRP3</i> | Os11g0614800        | Os11g0614800   COMBINER_EST   Os11g0614800   8 |
| <i>OsKRP4</i> | Os10g0471700        | Os10g0471700   mRNA   AK073804   CDS+3'UTR     |
| <i>OsKRP5</i> | Os03g0137800        | Os03g0137800   mRNA   AK064723   CDS+3'UTR     |
| <i>OsKRP6</i> | Os09g0459900        | Os09g0459900   mRNA   AK063208   CDS+3'UTR     |

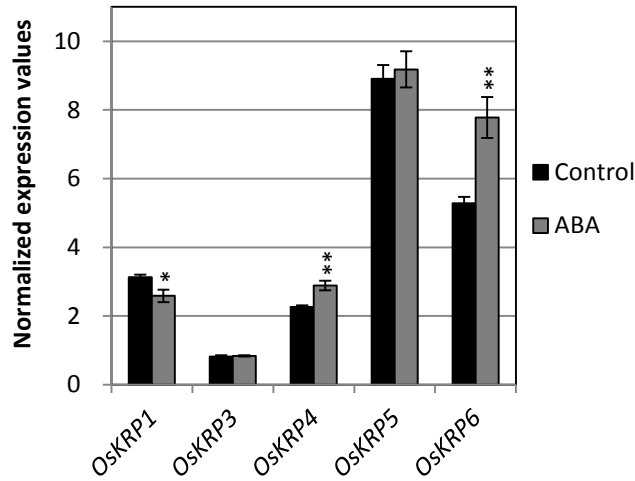

**Supplementary Fig. S1** Normalized microarray expression values of *OsKRPs* after ABA treatment for 6 h. Three biological replicates were performed. Error bars show SD (n = 3). \*P < 0.05, \*\*P < 0.01; Student's t-test.

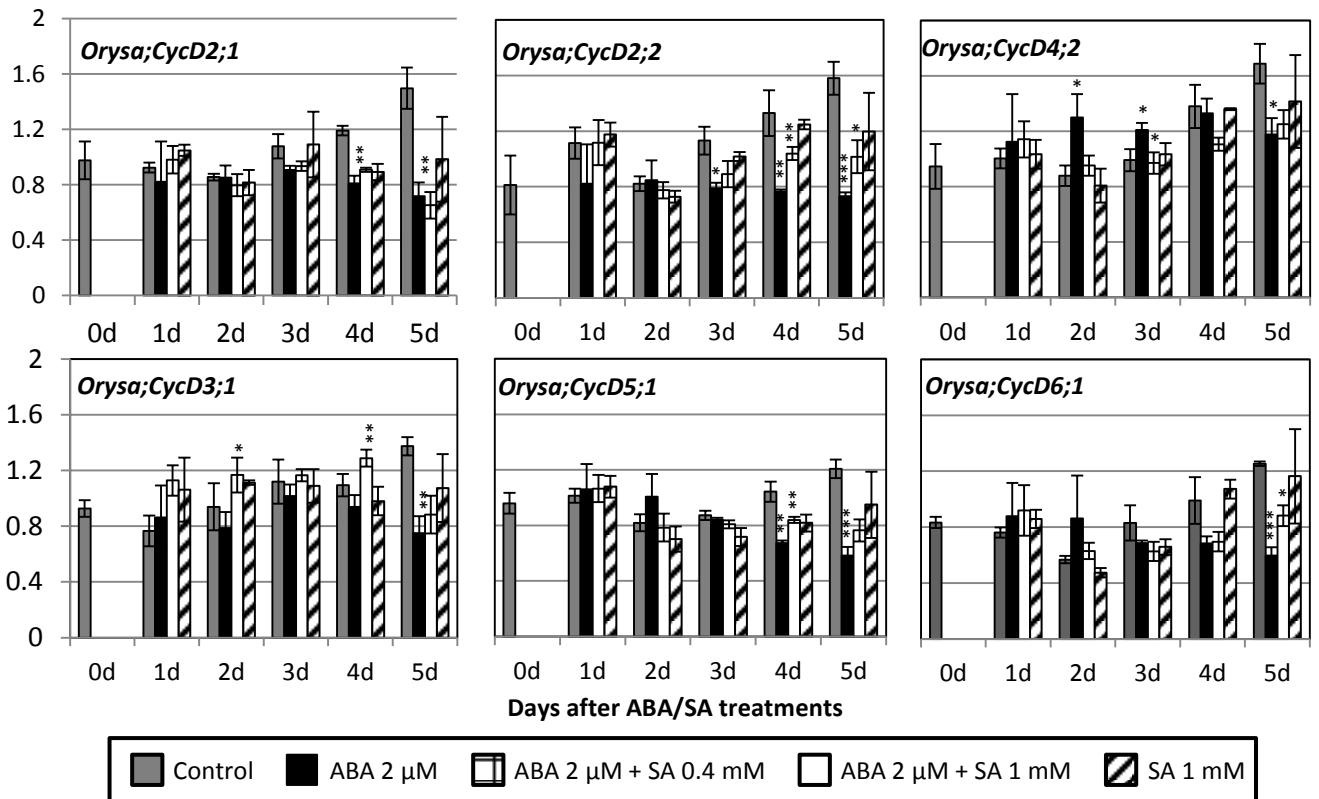

**Supplementary Fig. S2** Changes in expression of *Orysta;CycDs* in shoots of young rice seedlings during ABA and SA treatment. Error bars show SD (n = 3). Asterisks indicate a significant difference between the ABA-only and ABA + SA treatments (\*P < 0.05, \*\*P < 0.01, \*\*\*P < 0.001; Student's t-test).
